# Supplementary material
Source: Research Square preprint supplement (doi:10.21203/rs.3.rs-9738160/v1)
Supplement: Supplementary file 1 [file 2755f18e9a6e2b318ec18a91.docx]

STROBE Statement—checklist of items that should be included in reports of observational studies

|  | Item No. | Recommendation | Page  No. | Relevant text from manuscript |
| --- | --- | --- | --- | --- |
| **Title and abstract** | 1 | (*a*) Indicate the study’s design with a commonly used term in the title or the abstract | 1 | Title: “Deep versus light sedation and 28-day mortality in mechanically ventilated sepsis: a causal analysis of two intensive care databases.” The retrospective cohort design is also stated in the abstract. |
| (*b*) Provide in the abstract an informative and balanced summary of what was done and what was found | 1 | The abstract summarises the objective, the two databases, the exposure and outcome definitions, the IPTW analysis with sensitivity analyses, and the principal results, including the validation cohort. |
| Introduction | | | |  |
| Background/rationale | 2 | Explain the scientific background and rationale for the investigation being reported | 2 | Introduction: the background on sedation depth in critically ill patients, the convergence of evidence towards lighter sedation, and the specific uncertainty in sepsis are explained, with reference to guidelines and prior cohorts. |
| Objectives | 3 | State specific objectives, including any prespecified hypotheses | 2–3 | Introduction (final paragraph): the aim was to estimate the effect of deep versus light sedation during the first 48 h of invasive ventilation on 28-day mortality, and on delirium and ICU and in-hospital mortality, and to test replication in an independent cohort. |
| Methods | | | |  |
| Study design | 4 | Present key elements of study design early in the paper | 4 | Methods, “Study design and data sources”: a retrospective cohort study informed by the principles of the target trial emulation framework, structured around eligibility, treatment-strategy definition, time zero, and outcome assessment. |
| Setting | 5 | Describe the setting, locations, and relevant dates, including periods of recruitment, exposure, follow-up, and data collection | 4 | Methods, “Study design and data sources”: the primary analysis used MIMIC-IV (version 3.1), a single-centre US database; external validation used the eICU-CRD (version 2.0), a multicentre US database. Database contents and access are described. |
| Participants | 6 | (*a*) *Cohort study*—Give the eligibility criteria, and the sources and methods of selection of participants. Describe methods of follow-up  *Case-control study*—Give the eligibility criteria, and the sources and methods of case ascertainment and control selection. Give the rationale for the choice of cases and controls  *Cross-sectional study*—Give the eligibility criteria, and the sources and methods of selection of participants | 4–5 | Methods, “Study population and cohort derivation”: eligible patients were adults (≥ 18 years) meeting Sepsis-3 criteria who received invasive ventilation within 24 h of ICU admission, with an ICU stay ≥ 48 h and ≥ 6 RASS assessments in the first 48 h. Exclusions and one-admission-per-patient selection are specified. |
| (*b*)*Cohort study*—For matched studies, give matching criteria and number of exposed and unexposed  *Case-control study*—For matched studies, give matching criteria and the number of controls per case | 7 | Methods, “Statistical analysis”: matching is not the primary design; as a sensitivity analysis, 1:1 nearest-neighbour propensity score matching without replacement was used (caliper 0.2 SD of the logit of the propensity score). Matched numbers are reported in Results and Supplementary Table S5. |
| Variables | 7 | Clearly define all outcomes, exposures, predictors, potential confounders, and effect modifiers. Give diagnostic criteria, if applicable | 5–7 | Methods, “Exposure,” “Outcomes,” and “Covariates”: the exposure (median RASS over the first 48 h), the primary outcome (28-day mortality) and secondary outcomes, and the prespecified baseline covariates and effect modifiers are each defined. |
| Data sources/ measurement | 8* | For each variable of interest, give sources of data and details of methods of assessment (measurement). Describe comparability of assessment methods if there is more than one group | 5–7 | Methods, “Exposure,” “Outcomes,” “Covariates,” and Supplementary Methods (Sections S1–S7, Table S4): sources and assessment methods for every variable, including item identifiers and source tables, are described; comparability across the two databases is addressed. |
| Bias | 9 | Describe any efforts to address potential sources of bias | 4–8 | Methods: confounding by indication was addressed by IPTW with a prespecified covariate set; immortal time bias was avoided by placing time zero at the end of the exposure window; neuro/neurosurgical ICU patients were excluded to limit exposure misclassification. |
| Study size | 10 | Explain how the study size was arrived at | 9 | Results, “Cohort derivation,” and Figure 1: the study size was determined by the number of eligible patients meeting all criteria in each database (8,477 in MIMIC-IV; 844 in eICU-CRD); no formal sample-size calculation was performed. |

Continued on next page

| Quantitative variables | 11 | Explain how quantitative variables were handled in the analyses. If applicable, describe which groupings were chosen and why | 5–7 | Methods, “Exposure” and “Statistical analysis”: continuous variables are summarised as mean (SD) or median (IQR); the exposure was handled as a binary strategy from the median RASS; SOFA score was additionally analysed in prespecified categories. |
| --- | --- | --- | --- | --- |
| Statistical methods | 12 | (*a*) Describe all statistical methods, including those used to control for confounding | 7 | Methods, “Statistical analysis”: confounding was addressed by inverse probability of treatment weighting using a multivariable logistic propensity score; weighted logistic, Cox, and linear models estimated the OR, HR, and risk difference, with robust variance. |
| (*b*) Describe any methods used to examine subgroups and interactions | 8 | Methods, “Statistical analysis”: effect modification was examined in four prespecified subgroups (age, SOFA category, septic shock, neuromuscular blockade) by repeating the weighted analysis within strata and testing a multiplicative exposure-by-subgroup interaction term. |
| (*c*) Explain how missing data were addressed | 7 | Methods, “Statistical analysis”: missing values, confined to laboratory covariates and the APACHE IVa score, were imputed by predictive mean matching using chained equations; a multiple-imputation sensitivity analysis pooled five datasets by Rubin’s rules (Supplementary Methods, S8). |
| (*d*) *Cohort study*—If applicable, explain how loss to follow-up was addressed  *Case-control study*—If applicable, explain how matching of cases and controls was addressed  *Cross-sectional study*—If applicable, describe analytical methods taking account of sampling strategy | 6 | Methods, “Outcomes”: vital status was obtained from the structured death and discharge records of each database. In eICU-CRD, vital status is recorded only to hospital discharge (Supplementary Methods, S5); follow-up for the primary outcome began at time zero. |
| (*e*) Describe any sensitivity analyses | 7–8 | Methods, “Statistical analysis”: three prespecified sensitivity analyses were performed—propensity score matching, multiple imputation, and an E-value for unmeasured confounding. |
| Results | | | | |
| Participants | 13* | (a) Report numbers of individuals at each stage of study—eg numbers potentially eligible, examined for eligibility, confirmed eligible, included in the study, completing follow-up, and analysed | 9 | Results, “Cohort derivation,” and Figure 1: numbers at each stage are reported—eligible stays, classification by sedation depth, and exclusions—for both the MIMIC-IV and eICU-CRD cohorts. |
| (b) Give reasons for non-participation at each stage | 9 | Results, “Cohort derivation,” and Figure 1: reasons for exclusion (agitated or intermediate sedation depth; admission to a neurological or neurosurgical ICU) and the corresponding numbers are given for each cohort. |
| (c) Consider use of a flow diagram | 9, 22 | A flow diagram is provided as Figure 1, showing the derivation of both the primary and validation cohorts. |
| Descriptive data | 14* | (a) Give characteristics of study participants (eg demographic, clinical, social) and information on exposures and potential confounders | 9–10 | Results, “Baseline characteristics,” Table 1, and Supplementary Table S2: demographic, clinical, and treatment characteristics of both cohorts are reported by sedation group, with standardized mean differences. |
| (b) Indicate number of participants with missing data for each variable of interest | 7, 10 | Numbers with missing data are reported in the Supplementary Methods (S8): in MIMIC-IV, lactate was missing for 11.9% and other laboratory covariates for < 0.1%; in eICU-CRD, lactate 24.8% and APACHE IVa 5.1%. |
| (c) *Cohort study*—Summarise follow-up time (eg, average and total amount) | 5–6 | Follow-up was a fixed 28-day window measured from time zero (48 h after the initiation of invasive ventilation); the exposure window itself was a fixed 48 h, so follow-up time did not vary by design. |
| Outcome data | 15* | *Cohort study*—Report numbers of outcome events or summary measures over time | 10–12 | Results, “Primary outcome,” “Secondary outcomes,” and “External validation,” Table 2, and Figure 2: numbers of deaths and crude and adjusted mortality are reported for 28-day, ICU, and in-hospital mortality and for delirium. |
| *Case-control study—*Report numbers in each exposure category, or summary measures of exposure |  |  |
| *Cross-sectional study—*Report numbers of outcome events or summary measures |  |  |
| Main results | 16 | (*a*) Give unadjusted estimates and, if applicable, confounder-adjusted estimates and their precision (eg, 95% confidence interval). Make clear which confounders were adjusted for and why they were included | 10–12 | Results, “Primary outcome” and “External validation,” Table 2: crude mortality and IPTW-adjusted estimates (OR, HR, risk difference) with 95% confidence intervals are reported for all outcomes in both cohorts. |
| (*b*) Report category boundaries when continuous variables were categorized | 8, 11 | Category boundaries are reported for SOFA score (≤ 6, 7–10, > 10) and age (< 65, ≥ 65 years) in the Methods and in Table 3. |
| (*c*) If relevant, consider translating estimates of relative risk into absolute risk for a meaningful time period | 10 | Results, “Primary outcome,” and Table 2: the effect on 28-day mortality is reported on the absolute scale as a risk difference of 15.4 percentage points alongside the odds ratio. |

Continued on next page

| Other analyses | 17 | Report other analyses done—eg analyses of subgroups and interactions, and sensitivity analyses | 11–12 | Results, “Sensitivity analyses” and “Subgroup analyses,” Tables 2 and 3, Figure 3: propensity score matching, multiple imputation, the E-value, and four prespecified subgroup analyses with interaction tests are reported. |
| --- | --- | --- | --- | --- |
| Discussion | | | | |
| Key results | 18 | Summarise key results with reference to study objectives | 13 | Discussion (opening paragraph) and Conclusions: the key result—higher 28-day mortality with deep sedation (OR 2.37), reproduced in the validation cohort—is summarised with reference to the study objectives. |
| Limitations | 19 | Discuss limitations of the study, taking into account sources of potential bias or imprecision. Discuss both direction and magnitude of any potential bias | 15–17 | Discussion (Limitations): observational design and residual confounding, exposure misclassification, the 48-h survivor requirement, violation of proportional hazards, ascertainment bias for delirium, and the reduced validation-cohort model are discussed. |
| Interpretation | 20 | Give a cautious overall interpretation of results considering objectives, limitations, multiplicity of analyses, results from similar studies, and other relevant evidence | 13–17 | Discussion: a cautious interpretation is given, emphasising that direction and consistency are more secure than the precise magnitude, that subgroup findings are hypothesis-generating, and that the design precludes a definitive causal conclusion. |
| Generalisability | 21 | Discuss the generalisability (external validity) of the study results | 14 | Discussion: external validity is addressed through replication in the eICU-CRD cohort drawn from 35 hospitals, with explicit discussion of differences in case mix, sepsis definition, and outcome ascertainment between the cohorts. |
| Other information | |  | | |
| Funding | 22 | Give the source of funding and the role of the funders for the present study and, if applicable, for the original study on which the present article is based | 18 | Declarations, “Funding”: the study received no specific grant from any funding agency in the public, commercial, or not-for-profit sectors. |

*Give information separately for cases and controls in case-control studies and, if applicable, for exposed and unexposed groups in cohort and cross-sectional studies.

**Note:** An Explanation and Elaboration article discusses each checklist item and gives methodological background and published examples of transparent reporting. The STROBE checklist is best used in conjunction with this article (freely available on the Web sites of PLoS Medicine at http://www.plosmedicine.org/, Annals of Internal Medicine at http://www.annals.org/, and Epidemiology at http://www.epidem.com/). Information on the STROBE Initiative is available at www.strobe-statement.org.
